# Supplementary material for: Using Heating and Cooling Presses in Combination to Optimize the Consolidation Process of Polycarbonate-Based Unidirectional Thermoplastic Composite Tapes
Source: MDPI journal article supplement (doi:10.3390/polym15234500), 2023-11-23
Supplement: s1 [file s1]

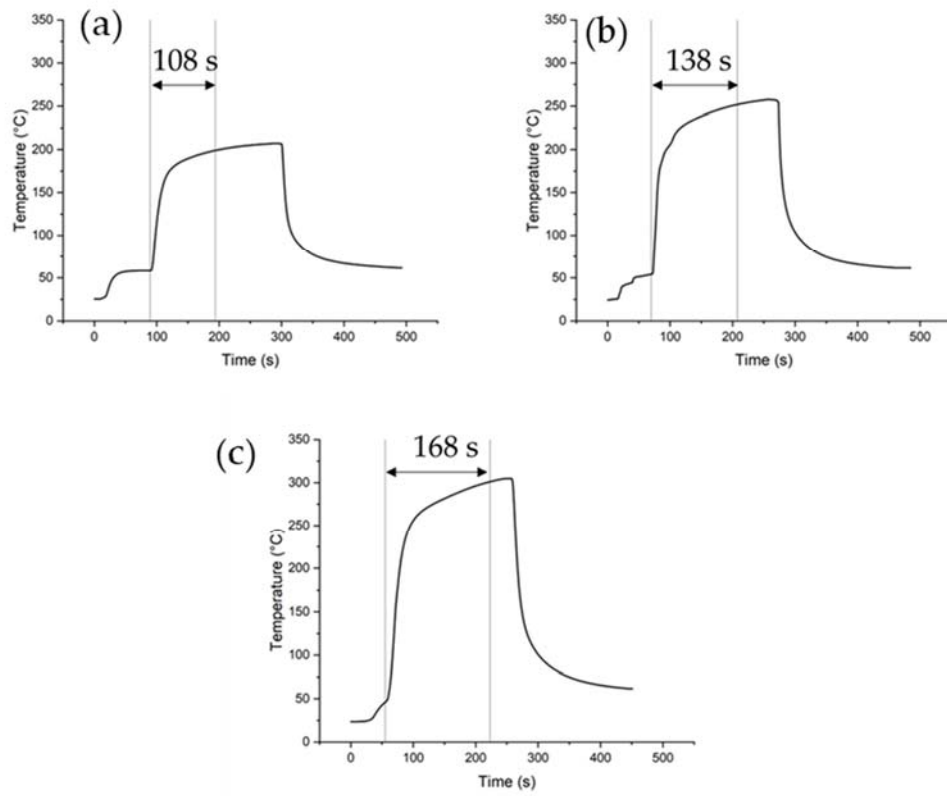

**Figure S1.** Temperature development at the sample core at set temperatures of a) 200°C, b) 250°C and c) 300°C. The first vertical black line indicates the start of the process, while the second shows the time at which the core has reached the set temperature.

**Table S1.** Experimental design used in the screening test.

| Run | Heating press<br>temperature | Heating press<br>pressure | Cooling press<br>temperature | Cooling press<br>pressure | Holding time |
|-----|------------------------------|---------------------------|------------------------------|---------------------------|--------------|
|     | [°C]                         | [bar]                     | [°C]                         | [bar]                     | [s]          |
| 1   | 200                          | 5                         | 100                          | 30                        | 5            |
| 2   | 200                          | 1                         | 60                           | 30                        | 10           |
| 3   | 200                          | 5                         | 60                           | 10                        | 15           |
| 4   | 200                          | 3                         | 140                          | 10                        | 5            |
| 5   | 200                          | 1                         | 140                          | 20                        | 15           |
| 6   | 250                          | 1                         | 60                           | 10                        | 5            |
| 7   | 250                          | 5                         | 140                          | 30                        | 15           |
| 8   | 250                          | 3                         | 100                          | 20                        | 10           |
| 9   | 300                          | 5                         | 60                           | 20                        | 5            |
| 10  | 300                          | 5                         | 140                          | 10                        | 10           |
| 11  | 300                          | 3                         | 60                           | 30                        | 15           |
| 12  | 300                          | 1                         | 140                          | 30                        | 5            |
| 13  | 300                          | 1                         | 100                          | 10                        | 15           |

**Table S2.** Experimental design used in the optimization test.

| <b>Run</b> | <b>Heating press<br/>temperature</b> | <b>Cooling press<br/>temperature</b> | <b>Heating press<br/>temperature</b> | <b>Cooling press<br/>pressure</b> |
|------------|--------------------------------------|--------------------------------------|--------------------------------------|-----------------------------------|
|            | <b>[°C]</b>                          | <b>[°C]</b>                          | <b>bar]</b>                          | <b>[bar]</b>                      |
| 1          | 325                                  | 40                                   | 3.3                                  | 46                                |
| 2          | 325                                  | 73                                   | 6.5                                  | 10                                |
| 3          | 325                                  | 100                                  | 0.6                                  | 85                                |
| 4          | 325                                  | 100                                  | 6.5                                  | 85                                |
| 5          | 325                                  | 40                                   | 0.6                                  | 85                                |
| 6          | 325                                  | 100                                  | 3.6                                  | 10                                |
| 7          | 325                                  | 72                                   | 0.6                                  | 48.3                              |
| 8          | 250                                  | 100                                  | 6.5                                  | 10                                |
| 9          | 250                                  | 40                                   | 6.5                                  | 85                                |
| 10         | 250                                  | 40                                   | 0.6                                  | 10                                |
| 11         | 250                                  | 100                                  | 0.6                                  | 85                                |
| 12         | 325                                  | 40                                   | 0.6                                  | 10                                |
| 13         | 325                                  | 100                                  | 3.4                                  | 47.1                              |
| 14         | 325                                  | 40                                   | 6.5                                  | 85                                |
| 15         | 288                                  | 70                                   | 3.6                                  | 47.5                              |
| 16         | 288                                  | 70                                   | 3.6                                  | 47.5                              |
| 17         | 288                                  | 70                                   | 3.6                                  | 47.5                              |
| 18         | 250                                  | 40                                   | 6.5                                  | 10                                |
| 19         | 250                                  | 40                                   | 0.6                                  | 85                                |
| 20         | 250                                  | 100                                  | 6.5                                  | 85                                |
| 21         | 250                                  | 100                                  | 0.6                                  | 10                                |
| 22         | 288                                  | 40                                   | 6.5                                  | 49.8                              |
| 23         | 288                                  | 69                                   | 0.6                                  | 10                                |
| 24         | 288                                  | 100                                  | 3.4                                  | 85                                |
| 25         | 288                                  | 100                                  | 6.5                                  | 10                                |
| 26         | 325                                  | 40                                   | 6.5                                  | 10                                |
| 27         | 325                                  | 100                                  | 6.5                                  | 49.4                              |
| 28         | 325                                  | 68                                   | 3.5                                  | 85                                |
| 29         | 325                                  | 100                                  | 0.6                                  | 10                                |

**Table S3.** ANOVA for the influence of consolidation settings on the projected area in the screening trial.

| Source                      | Sum of Squares     | df | Mean Square        | F-value | p-value |
|-----------------------------|--------------------|----|--------------------|---------|---------|
| <b>Model</b>                | $7.61 \times 10^7$ | 6  | $1.27 \times 10^7$ | 14.33   | 0.0025  |
| A-Heat press temperature    | $5.85 \times 10^7$ | 1  | $5.85 \times 10^7$ | 66.15   | 0.0002  |
| B-Heat press pressure       | $1.03 \times 10^7$ | 1  | $1.03 \times 10^7$ | 11.65   | 0.0143  |
| C-Cooling press temperature | $1.01 \times 10^5$ | 1  | $1.01 \times 10^5$ | 0.1138  | 0.7473  |
| D-Cooling press pressure    | 44135.27           | 1  | 44135.27           | 0.0499  | 0.8307  |
| E-Holding time              | 29403.28           | 1  | 29403.28           | 0.0332  | 0.8614  |
| AB                          | $7.09 \times 10^6$ | 1  | $7.09 \times 10^6$ | 8.02    | 0.0299  |
| <b>Residual</b>             | $5.31 \times 10^6$ | 6  | $8.85 \times 10^5$ |         |         |
| <b>Cor Total</b>            | $8.14 \times 10^7$ | 12 |                    |         |         |

**Table S4.** ANOVA for the influence of consolidation settings on the thickness in the screening trial.

| Source                      | Sum of Squares | df | Mean Square | F-value | p-value |
|-----------------------------|----------------|----|-------------|---------|---------|
| <b>Model</b>                | 0.1805         | 6  | 0.0301      | 6.32    | 0.0205  |
| A-Heat press temperature    | 0.1476         | 1  | 0.1476      | 31.03   | 0.0014  |
| B-Heat press pressure       | 0.0202         | 1  | 0.0202      | 4.25    | 0.085   |
| C-Cooling press temperature | 0.0016         | 1  | 0.0016      | 0.3292  | 0.587   |
| D-Cooling press pressure    | 0.001          | 1  | 0.001       | 0.2078  | 0.6645  |
| E-Holding time              | 0.0001         | 1  | 0.0001      | 0.0165  | 0.902   |
| AB                          | 0.01           | 1  | 0.01        | 2.11    | 0.1968  |
| <b>Residual</b>             | 0.0285         | 6  | 0.0048      |         |         |
| <b>Cor Total</b>            | 0.209          | 12 |             |         |         |

**Table S5.** ANOVA for the influence of consolidation settings on the warpage in the screening trial.

| Source                      | Sum of Squares | df | Mean Square | F-value | p-value |
|-----------------------------|----------------|----|-------------|---------|---------|
| <b>Model</b>                | 1224.52        | 6  | 204.09      | 9.94    | 0.0066  |
| A-Heating press temperature | 941.92         | 1  | 941.92      | 45.88   | 0.0005  |

|                             |         |    |        |        |        |
|-----------------------------|---------|----|--------|--------|--------|
| B-Heating press pressure    | 153.87  | 1  | 153.87 | 7.5    | 0.0338 |
| C-Cooling press temperature | 13.36   | 1  | 13.36  | 0.6506 | 0.4507 |
| D-Cooling press pressure    | 18.82   | 1  | 18.82  | 0.9168 | 0.3753 |
| E-Holding time              | 0.2758  | 1  | 0.2758 | 0.0134 | 0.9115 |
| AB                          | 96.28   | 1  | 96.28  | 4.69   | 0.0735 |
| <b>Residual</b>             | 123.17  | 6  | 20.53  |        |        |
| <b>Cor Total</b>            | 1347.69 | 12 |        |        |        |

**Table S6.** ANOVA for the influence of consolidation settings on the density in the screening trial.

| Source                      | Sum of Squares | df | Mean Square | F-value | p-value |
|-----------------------------|----------------|----|-------------|---------|---------|
| <b>Model</b>                | 0.0024         | 6  | 0.0004      | 17.91   | 0.0014  |
| A-Heating press temperature | 0.0018         | 1  | 0.0018      | 80.44   | 0.0001  |
| B-Heating press pressure    | 0.0003         | 1  | 0.0003      | 13.11   | 0.0111  |
| C-Cooling press temperature | 0              | 1  | 0           | 2.09    | 0.1982  |
| D-Cooling press pressure    | 0.0002         | 1  | 0.0002      | 8.48    | 0.0269  |
| E-Holding time              | 2.49E-07       | 1  | 2.49E-07    | 0.0112  | 0.9193  |
| AB                          | 0.0001         | 1  | 0.0001      | 3.32    | 0.1183  |
| <b>Residual</b>             | 0.0001         | 6  | 0           |         |         |

**Table S7.** ANOVA for the influence of consolidation settings on the ASS in the screening trial.

| Source                      | Sum of Squares | df | Mean Square | F-value | p-value  |
|-----------------------------|----------------|----|-------------|---------|----------|
| <b>Model</b>                | 313.03         | 6  | 52.17       | 38.36   | 0.0002   |
| A-Heating press temperature | 285.76         | 1  | 285.76      | 210.1   | < 0.0001 |
| B-Heating press pressure    | 4.45           | 1  | 4.45        | 3.27    | 0.1206   |
| C-Cooling press temperature | 3.4            | 1  | 3.4         | 2.5     | 0.1651   |
| D-Cooling press pressure    | 0.0251         | 1  | 0.0251      | 0.0185  | 0.8964   |
| E-Holding time              | 1.91           | 1  | 1.91        | 1.41    | 0.2804   |
| AB                          | 17.49          | 1  | 17.49       | 12.86   | 0.0116   |
| <b>Residual</b>             | 8.16           | 6  | 1.36        |         |          |
| <b>Cor Total</b>            | 321.19         | 12 |             |         |          |

**Table S8.** ANOVA for the influence of consolidation settings on the thickness in the optimization trial.

| Source                      | Term df | Error df | F-value | p-value  |
|-----------------------------|---------|----------|---------|----------|
| Whole-plot                  | 2       | 14       | 81.6    | < 0.0001 |
| a-Heating press temperature | 1       | 14       | 153.11  | < 0.0001 |
| a <sup>2</sup>              | 1       | 14       | 0.6165  | 0.4454   |
| Subplot                     | 12      | 14       | 22.12   | < 0.0001 |
| B-Cooling press temperature | 1       | 14       | 0.103   | 0.753    |
| C-Heating press pressure    | 1       | 14       | 97.58   | < 0.0001 |
| D-Cooling press pressure    | 1       | 14       | 79.3    | < 0.0001 |
| aB                          | 1       | 14       | 0.605   | 0.4496   |
| aC                          | 1       | 14       | 6.5     | 0.0232   |
| aD                          | 1       | 14       | 2.45    | 0.1399   |
| BC                          | 1       | 14       | 1.68    | 0.2155   |
| BD                          | 1       | 14       | 1.13    | 0.306    |
| CD                          | 1       | 14       | 1.32    | 0.2707   |
| B <sup>2</sup>              | 1       | 14       | 0.3544  | 0.5612   |
| C <sup>2</sup>              | 1       | 14       | 9.92    | 0.0071   |
| D <sup>2</sup>              | 1       | 14       | 25.46   | 0.0002   |

**Table S9.** ANOVA for the influence of consolidation settings on the warpage in the optimization trial.

| Source                      | Term df | Error df | F-value | p-value |
|-----------------------------|---------|----------|---------|---------|
| <b>Whole-plot</b>           | 2       | 14       | 0.1799  | 0.8373  |
| a-Heating press temperature | 1       | 14       | 0.1237  | 0.7302  |
| a <sup>2</sup>              | 1       | 14       | 0.1253  | 0.7286  |
| <b>Subplot</b>              | 12      | 14       | 0.8526  | 0.6049  |
| B-Cooling press temperature | 1       | 14       | 0.1901  | 0.6695  |
| C-Heating press pressure    | 1       | 14       | 0.0022  | 0.9633  |
| D-Cooling press pressure    | 1       | 14       | 3.94    | 0.0671  |
| aB                          | 1       | 14       | 0.6114  | 0.4473  |
| aC                          | 1       | 14       | 2.45    | 0.1398  |
| aD                          | 1       | 14       | 0.0136  | 0.9088  |
| BC                          | 1       | 14       | 1.17    | 0.2973  |
| BD                          | 1       | 14       | 0.2304  | 0.6387  |

|                |   |    |        |        |
|----------------|---|----|--------|--------|
| CD             | 1 | 14 | 0.5952 | 0.4533 |
| B <sup>2</sup> | 1 | 14 | 0.0033 | 0.9551 |
| C <sup>2</sup> | 1 | 14 | 0.1968 | 0.6641 |
| D <sup>2</sup> | 1 | 14 | 0.1523 | 0.7023 |

**Table S10.** ANOVA for the influence of consolidation settings on the void content in the optimization trial.

| Source                      | Term df | Error df | F-value | p-value  |
|-----------------------------|---------|----------|---------|----------|
| <b>Whole-plot</b>           | 2       | 14       | 14.5    | 0.0004   |
| a-Heating press temperature | 1       | 14       | 28.41   | 0.0001   |
| a <sup>2</sup>              | 1       | 14       | 0.821   | 0.3802   |
| <b>Subplot</b>              | 12      | 14       | 38.68   | < 0.0001 |
| B-Cooling press temperature | 1       | 14       | 8.22    | 0.0124   |
| C-Heating press pressure    | 1       | 14       | 0.8414  | 0.3745   |
| D-Cooling press pressure    | 1       | 14       | 320.56  | < 0.0001 |
| aB                          | 1       | 14       | 0.4229  | 0.526    |
| aC                          | 1       | 14       | 1.05    | 0.322    |
| aD                          | 1       | 14       | 0.4893  | 0.4957   |
| BC                          | 1       | 14       | 6.01    | 0.0279   |
| BD                          | 1       | 14       | 2.87    | 0.1123   |
| CD                          | 1       | 14       | 11.73   | 0.0041   |
| B <sup>2</sup>              | 1       | 14       | 0.0131  | 0.9103   |
| C <sup>2</sup>              | 1       | 14       | 2.57    | 0.1312   |
| D <sup>2</sup>              | 1       | 14       | 88.79   | < 0.0001 |

**Table S11.** Average fiber, matrix, and void fraction in the optimization trials.

| Run | Fiber volume content [%] | Matrix volume content [%] | Void content [%] |
|-----|--------------------------|---------------------------|------------------|
| 1   | 51.44                    | 43.51                     | 5.04             |
| 2   | 50.27                    | 43.37                     | 6.36             |
| 3   | 51.44                    | 43.69                     | 4.87             |
| 4   | 51.72                    | 43.65                     | 4.64             |
| 5   | 51.80                    | 43.21                     | 4.99             |
| 6   | 50.14                    | 43.38                     | 6.48             |
| 7   | 50.08                    | 45.02                     | 4.90             |
| 8   | 50.29                    | 43.26                     | 6.46             |
| 9   | 49.86                    | 44.76                     | 5.38             |

|    |       |       |      |
|----|-------|-------|------|
| 10 | 49.53 | 43.65 | 6.82 |
| 11 | 50.84 | 43.73 | 5.43 |
| 12 | 49.93 | 44.13 | 5.94 |
| 13 | 50.67 | 44.38 | 4.95 |
| 14 | 51.23 | 43.65 | 5.13 |
| 15 | 51.21 | 43.81 | 4.97 |
| 16 | 51.19 | 43.75 | 5.06 |
| 17 | 50.94 | 44.02 | 5.05 |
| 18 | 49.94 | 42.84 | 7.22 |
| 19 | 50.84 | 43.72 | 5.44 |
| 20 | 51.37 | 43.39 | 5.24 |
| 21 | 50.26 | 43.18 | 6.56 |
| 22 | 50.83 | 44.16 | 5.00 |
| 23 | 50.74 | 42.81 | 6.45 |
| 24 | 50.93 | 43.89 | 5.18 |
| 25 | 50.87 | 42.68 | 6.45 |
| 26 | 50.20 | 42.91 | 6.89 |
| 27 | 51.30 | 43.97 | 4.74 |
| 28 | 50.90 | 44.11 | 4.99 |
| 29 | 50.87 | 43.34 | 5.79 |

**Table S12.** ANOVA for the influence of consolidation settings on the apparent shear strength in the optimization trial.

| Source                      | Term df | Error df | F-value | p-value  |
|-----------------------------|---------|----------|---------|----------|
| <b>Whole-plot</b>           | 2       | 14       | 92.87   | < 0.0001 |
| a-Heating press temperature | 1       | 14       | 161.27  | < 0.0001 |
| a <sup>2</sup>              | 1       | 14       | 0.6403  | 0.437    |
| <b>Subplot</b>              | 12      | 14       | 6.27    | 0.0009   |
| B-Cooling press temperature | 1       | 14       | 5.05    | 0.0413   |
| C-Heating press pressure    | 1       | 14       | 29.35   | < 0.0001 |
| D-Cooling press pressure    | 1       | 14       | 16.6    | 0.0011   |
| aB                          | 1       | 14       | 0.2226  | 0.6444   |
| aC                          | 1       | 14       | 3.01    | 0.1046   |
| aD                          | 1       | 14       | 1.03    | 0.3274   |
| BC                          | 1       | 14       | 3.5     | 0.0826   |
| BD                          | 1       | 14       | 0.0007  | 0.979    |



|                |   |    |        |        |
|----------------|---|----|--------|--------|
| CD             | 1 | 14 | 0.1703 | 0.6861 |
| B <sup>2</sup> | 1 | 14 | 0.049  | 0.828  |
| C <sup>2</sup> | 1 | 14 | 0.075  | 0.7882 |
| D <sup>2</sup> | 1 | 14 | 7.26   | 0.0174 |
